# Age, wound size and position of injury – dependent vascular regeneration assay in growing leaves

Dhanya Radhakrishnan<sup>1†</sup>, Anju Pallipurath Shanmukhan<sup>1†</sup>, Abdul Kareem<sup>1,2†</sup>, Mabel Maria Mathew<sup>1</sup>, Vijina Varaparambathu<sup>1</sup>, Mohammed Aiyaz<sup>1</sup>, Raji Krishna Radha<sup>1</sup>, Krishnaprashanth Ramesh Mekala<sup>1,3</sup>, Anil Shaji<sup>4</sup>, Kalika Prasad<sup>1\*</sup>

<sup>1</sup> School of Biology, Indian Institute of Science Education and Research, Thiruvananthapuram, Kerala 695551, India.

<sup>2</sup> Present Address: School of Life and Environmental Sciences, The University of Sydney, NSW, Australia.

<sup>3</sup> Present Address: Microbiology and Fermentation Technology Department, CSIR - Central Food Technological Research Institute, Mysuru, Karnataka 570020, India

<sup>4</sup> School of Physics, Indian Institute of Science Education and Research, Thiruvananthapuram, Kerala 695551, India.

†Dhanya Radhakrishnan, Anju P.S. and Abdul Kareem contributed equally to this work

\*Correspondence: kalika@iisertvm.ac.in

## ORCID ID:

A.K.: 0000-0002-0976-8652

A.S.: 0000-0002-1574-8885

K.P.: 0000-0001- 8666-856X

30 **ABSTRACT**

31 **Background**

32 Recurring damage to aerial organs of plants necessitates their prompt repair, particularly their  
33 vasculature. While vascular regeneration assay in aerial plant parts such as stem and  
34 inflorescence stalk are well established, those on leaf vasculature remained unexplored.  
35 Recently we established a new vascular regeneration assay in growing leaf and discovered the  
36 underlying molecular mechanism.

37 **Results**

38 Here we describe the detailed stepwise method of incision and the regeneration assay used for  
39 studying the leaf vascular regeneration. By using a combination of micro-surgical  
40 perturbations, brightfield microscopy and other experimental approaches, our new findings  
41 show that the regeneration efficiency decreases with aging of the leaf, and increases with the  
42 nearness of the wound towards the proximal end of the leaf.

43 **Conclusion**

44 This easy-to-master vascular regeneration assay is an efficient and rapid method to study the  
45 mechanism of vascular regeneration in growing leaves. It can be readily adapted for other plant  
46 species and can be combined with cellular and molecular biology techniques.

47 **Keywords:** Arabidopsis regeneration, leaf incision, vascular regeneration, wound size, age  
48 dependent

49

50

51

52

53

54

55

56

57

## 58 INTRODUCTION

59 Due to their sessile nature, plants are frequently subjected to injuries caused by biotic and  
60 abiotic factors. These injuries when left unattended can compromise the plant immunity,  
61 growth and even survival (Hwang, Yu, and Lai 2017; Radhakrishnan et al. 2020). In order to  
62 overcome the adversities of wounding, plants evolved a remarkable repertoire of regenerative  
63 responses ranging from, wound healing in the form of local cell proliferation to complete  
64 replacement of amputated organs, such as root tip regeneration (Ikeuchi et al. 2016;  
65 Shanmukhan et al. 2020). Although numerous studies have probed the mechanisms underlying  
66 several regenerative responses in plants, investigation regarding regeneration potential of aerial  
67 organs are limited (Durgaprasad et al. 2019; Iwase et al. 2011; Kareem et al. 2015). Thus,  
68 despite their higher susceptibility to injuries than underground organs, there is a dearth of  
69 information on regeneration in aerial organs of plants, particularly, in the leaves. Although  
70 leaves play a crucial role in plant physiology, their regeneration potential has hardly been  
71 investigated (Kuchen et al. 2012; Radhakrishnan et al. 2020).

72 Leaves possess an elaborate network of vascular tissue with a central midvein that transports  
73 substances to-and-fro between the main plant body. Damages to the midvein calls for prompt  
74 repair, failing which the transport of substances, and consequently the growth of the leaf and  
75 its adjacent branch are impaired (Radhakrishnan et al. 2020; Sachs and Hassidim 1996).  
76 Recently, a new vascular incision assay in leaf was developed to study the wound repair and  
77 tissue restoration in response to injury. The assay revealed that the mechanically disconnected  
78 parental stands are reunited by regenerating vascular tissue that bypasses the site of injury. The  
79 assay was instrumental in understanding the molecular mechanism underlying vascular  
80 regeneration in aerial organs growing in normal developmental context. Upon injury a coherent  
81 feed-forward loop comprising of cell fate determinants, PLETHORA (PLT) and CUP-  
82 SHAPED COTYLEDON2 (CUC2) activate the local auxin biosynthesis leading to vascular

83 regeneration in growing aerial organs (Radhakrishnan et al. 2020). Here we show that, in  
84 addition to the extent of the injury, regenerative ability of the leaf vasculature is determined by  
85 age of the leaf explant, and position of the injury along the proximo-distal axis of the leaf blade.  
86 This easy-to-master, reproducible assay can be performed using readily available laboratory  
87 supplies. The convenience of performing real time confocal imaging and other molecular  
88 techniques such as quantitative real time PCR using the injured leaves makes the assay valuable  
89 in studying the molecular players and mechanisms regulating wound induced response and  
90 regeneration in the normal developmental context. The method will also be useful in studying  
91 the interplay between mechanisms of vein patterning during development and that of vein  
92 regeneration.

## 93 **MATERIALS**

### 94 **Equipment**

#### 95 *Equipment for in vitro culture*

- 96 • Laminar Air Flow chamber (LAF)
- 97 • Sterile pipette-tips (200 µl and 1 ml)
- 98 • Micro pipettes
- 99 • 1.5 ml micro-centrifuge tubes
- 100 • Sterile disposable square Petri plates, size: 120 mm × 120 mm (Himedia PW050-1)
- 101 • Clingfilm (Himedia Phytawrap)
- 102 • Plant growth chamber (Percival AR-100L3).

103

#### 104 *Equipment for incision and sample collection*

- 105 • Fine pointed tweezer (Dumont tweezer, Style 5)

- 106 • Sterile razor blade
- 107 • Forceps
- 108 • Microscissors- Vannas scissor straight (Ted Pella, 1340)
- 109 • Gloves
- 110 • Face mask
- 111 • 70% ethanol
- 112 • 35mm round petriplate

113

#### 114 *Equipment for microscopy*

- 115 • Steriozoom microscope (Zeissstemi 2000) for incision and sample collection
- 116 • Confocal laser scanning microscope (Leica TCS SP5 II) for brightfield imaging
- 117 • Microscope slides (Labtech)
- 118 • Microscope cover glass 22×22mm (Corning 2850-22)
- 119 • Watercolour brush (with small bristles)

120

#### 121 **Reagents for Seed sterilization**

- 122 • Seeds of wildtype (Columbia) *Arabidopsis thaliana*
- 123 • 20% sodium hypochlorite
- 124 • 70% ethanol
- 125 • Autoclaved Milli-Q water.

126

127

128

## 129 **Murashige and Skoog (MS) medium preparation**

130 To prepare 1L (Half-strength) MS medium, add 2.165 g MS salt (Sigma Aldrich, M5524) and  
131 10 g sucrose (Sigma Aldrich, S0389) to about 850ml Milli-Q water. Adjust pH to 5.7 with 1 N  
132 KOH and make up the volume to 1L. Add 8 g plant Agar (Sigma Aldrich, A7921). Autoclave  
133 the medium (121 °C for 20 min) and cool it to about 45–50 °C. Add 1 ml of 100 mg/ ml filter-  
134 sterilized Ampicillin (final concentration in medium- 100 µg/ml) to 1L medium and pour 50 ml  
135 into each sterile square Petriplate (Himedia, PW050) within the LAF. Allow to cool and  
136 solidify.

137

## 138 **Reagents for decolourising sample**

- 139 • 15% ethanol
- 140 • 50% ethanol
- 141 • 70% ethanol
- 142 • 96% ethanol
- 143 • 100% ethanol
- 144 • Glycerol (Sigma Aldrich, G5516)
- 145 • Chloral hydrate (Sigma Aldrich, 23100)
- 146 • Milli-Q water

147 Preparation of clearing solution: Dissolve 8g chloral hydrate in 3ml water. Vortex the solution  
148 until chloral hydrate is completely dissolved. Add 1ml glycerol to the solution.

149 Note: The solution has to be freshly prepared for clearing the leaf samples. It is also used for  
150 mounting samples for brightfield confocal microscopy.

151

152

153 **METHOD**

154 **Seed sterilization**

155 Seed sterilization should to be performed within LAF under sterile conditions. The work space  
156 and tools (Micro pipette, tip boxes, reagent bottles) required for the procedure have to be  
157 thoroughly wiped with 70% ethanol and UV irradiated. Prior to commencement of *in vitro*  
158 culture, hands should be washed using soap and wiped with 70% ethanol. A liquid surface  
159 sterilization protocol for seeds is described here.

160 1. Aliquot the required number of wildtype seeds in 1.5ml microcentrifuge tube.

161 Note: For efficient sterilization do not take more than 300 seeds per tube and remove any  
162 debris such as parts of siliques left over from seed collection.

163 2. Add 1ml 70% ethanol. Agitate the contents by inverting the tube for 2-3 minutes.

164 Note: Prior to centrifugation, ensure that the centrifuge and rotor surfaces are clean. Avoid  
165 touching inside the lid of the microcentrifuge tube while opening and closing to minimize  
166 contamination.

167 3. Brief spin the tube at 6000rpm and carefully discard the ethanol without losing any seeds.

168 4. Add 1ml 20% sodium hypochlorite and shake the contents for 2-3 minutes. Repeat step 3.

169 5. Wash the seeds 5-7 times using 1ml sterile autoclaved Milli-Q water.

170 6. Stratify the seed in 1ml sterile autoclaved Milli-Q water for two days at 4°C.

171 7. Plate the seeds on half strength MS medium in rows with at least 0.5cm gap between  
172 consecutive seeds.

173 Note: For the ease of incision, avoid placing the seeds very close to each other.

174 8. Incubate the petriplates vertically in growth chamber under 45  $\mu\text{mol}/\text{m}^2/\text{s}$  continuous white  
175 light at 22°C and 70% relative humidity.

176

177

178 **Leaf Incision**

179

180 1. Leaf incision can be performed on work bench after adopting necessary measures to  
181 minimize contamination. Wear gloves and face mask during the procedure. Prior to the  
182 incision, wipe the surface of the dissection microscope (Zeiss stemi 2000) and gloved hands  
183 with 70% ethanol. The tweezer for incision should be dipped in 70% ethanol and left to dry  
184 for a few minutes before incision. Opening the plate on multiple days for incision will  
185 increase the incidence of contamination.

186 Note: Due to the fragile nature of the tweezer tips, sterilization techniques that may damage  
187 it or make it blunt are not recommended.

188 2. The plate containing seedlings is opened under a dissection microscope to confirm the age  
189 of the seedling and to perform incision in 5dpg (days post germination) old seedlings.

190 Note: Due to the asynchronous nature of seed germination, all the seedlings may not be of  
191 the same age. To maintain consistency, only injure plants which are at the desirable  
192 developmental stage. Move aside the uninjured plants to distinguish them from injured ones.  
193 Age of the seedlings is important as older seedling display reduced regeneration efficiency  
194 while very young leaves are extensively damaged during the procedure. The appropriate age  
195 of incision is between 4-6dpg (Figure1).

196

197 3. Out of the two leaves belonging to the first pair (true leaves), the leaf that faces the lid of  
198 the petriplate is chosen for incision due to the ease of access. Using the sharp tip of the  
199 tweezer an incision is made on the lower abaxial surface of the leaf belonging to the first  
200 pair. The incision is carefully performed at the junction between petiole and basal end of  
201 the lamina (Fig. 1A). This ensures that the injury occurs just above the first lateral vein  
202 (counted from base of the leaf) where the regeneration efficiency is highest in comparison



203 with other positions along the proximo-distal axis of the midvein (Fig. 2). The incision  
204 should be performed with just enough force so that it punctures the vascular tissue located  
205 close to the abaxial surface of the leaf without piercing out through the adaxial surface.  
206 This is important as extensive damages are not repaired (Radhakrishnan et al. 2020)(Fig.  
207 1P).

208 Note: Care should be taken, not to inflict multiple damages on the leaves. Therefore, it is  
209 not advisable to perform incision in both leaves of the first pair. During incision, a 200ul  
210 sterile microtip or sterile forceps can be used to restrict the movement of the plant.  
211 However, avoid touching the damaged leaves as it can inflict further damage.

212

213 4. After incision, the plates are closed and incubated vertically under continuous light  
214 condition at 22°C in growth chamber.

215

216 5. Four days post incision (dpi), the injured leaf is carefully cut at the petiole using a Vannas  
217 scissors and placed in 15 % ethanol in small round petriplates (35mm).

218 Note: Around 20-30 leaves can be treated using 2-3ml ethanol in 35mm petriplates during  
219 the decolourising procedure. Alternatively, 6 well plates can be used when handling  
220 multiple samples.

221

222

223

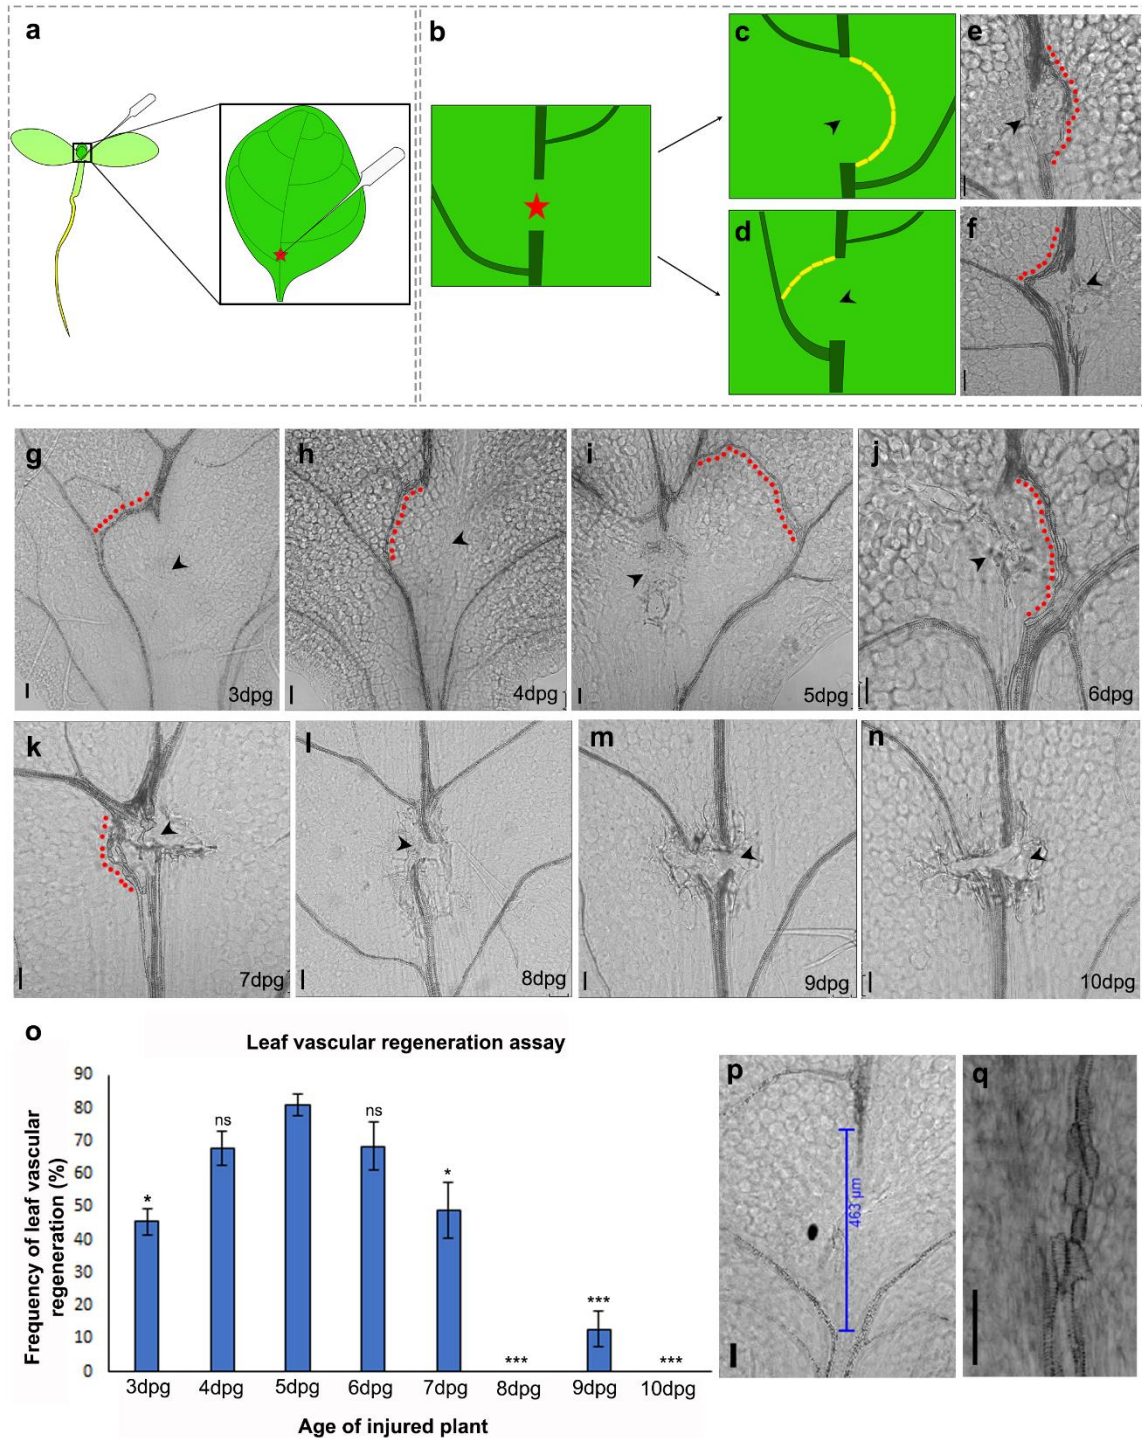

224

225 **Figure 1: Leaf vascular regeneration upon midvein injury depends on the age of the**  
226 **injured leaf**

227 (a-b) Illustration depicting the location of incision for effective vascular regeneration. Red star  
228 represents site of injury. (c,e) Schematic and brightfield image show the regenerating

229 vasculature re-uniting the disconnected parental stands forming a D-loop bypassing the site of  
230 injury. (d,f) Illustration and brightfield image show the regenerating vasculature connecting to  
231 the nearest lateral vein. Yellow blocks in the (c) and (e) represent end-to-end connected xylem  
232 elements. (g-n) Regeneration response in leaves injured at 3dpg (g)(\* $P=0.016$ ,  $n=24$ ), 4dpg  
233 (h)( $P=0.426$ ,not significant (ns),  $n=45$ ), 5dpg (i)( $n=20$ ), 6dpg (j)( $P=0.605$ ,not significant (ns),  
234  $n=40$ ), 7dpg (k)(\* $P=0.03$ ,  $n=34$ ),8dpg (l)(\*\*\* $P=1.6 \times 10^{-12}$ ,  $n=43$ ), 9dpg (m)(\*\*\* $P=2.405 \times 10^{-$   
235  $9$ ,  $n=52$ ), and 10dpg (n) (\*\*\* $P=4.8 \times 10^{-08}$ ,  $n=21$ ). Statistical analysis by Pearson's  $\chi^2$  test. Note  
236 that the 3-7dpg leaves are capable of reconnecting their disconnected vasculature but the  
237 regeneration efficiency declines with progressive aging of leaves. The regenerating vasculature  
238 is indicated by red dots. Black arrowheads indicate the site of injury. (o) Graph depicts  
239 frequency of leaf vascular regeneration in leaves injured at different ages. (p) Extensive  
240 damage creates a gap exceeding  $400\mu\text{m}$  between parental vascular strands, as a result no  
241 vascular regeneration is observed. (q)End-to-end attached xylem elements of regenerated  
242 vascular strand. Scale bars represent:  $50\mu\text{m}$

243

244

245

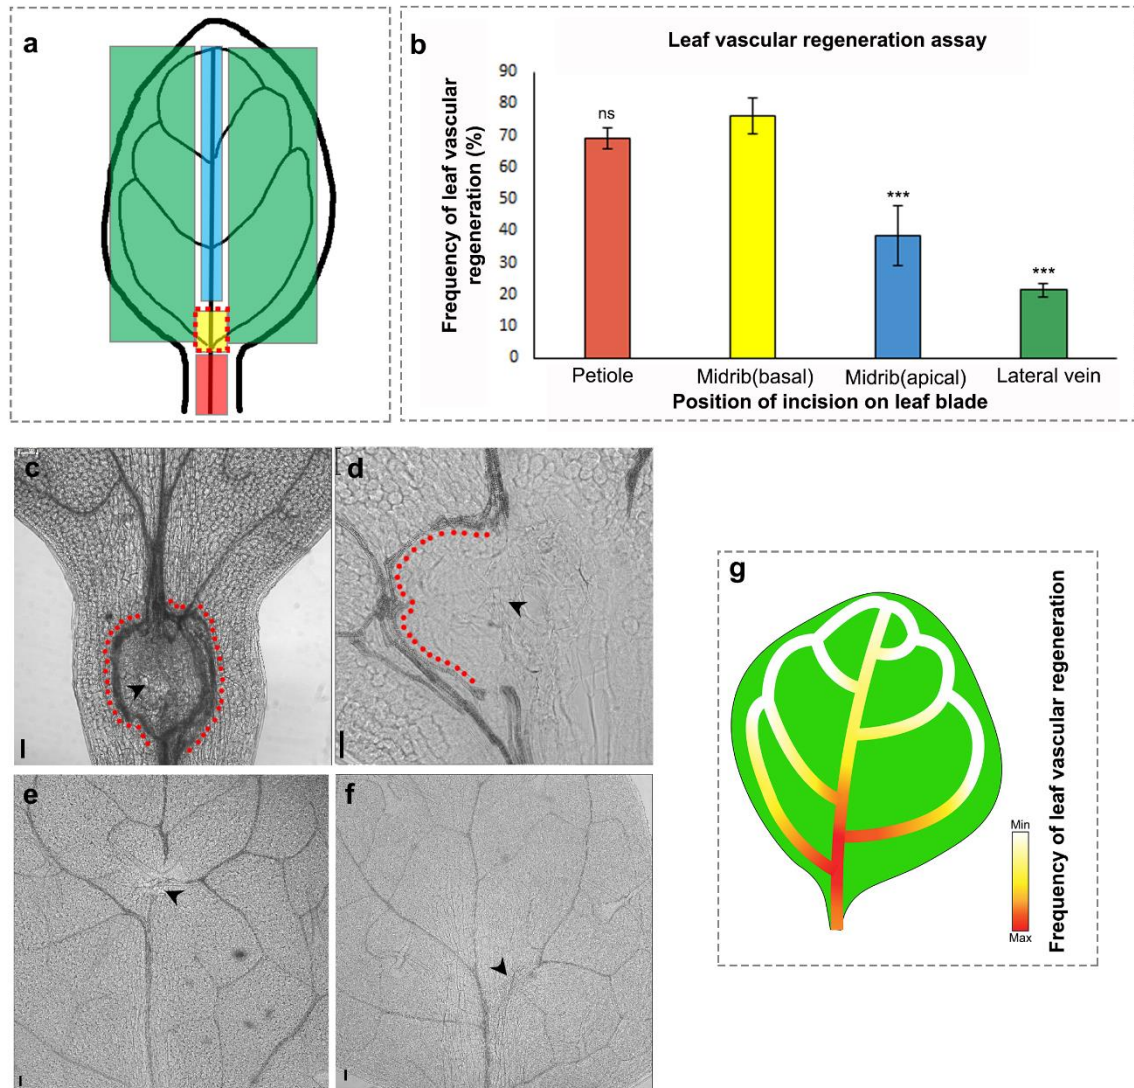

246

247 **Figure 2: Vascular regeneration in leaf depends on the position of injury in the leaf.**

248 (a) Schematic depicting positions of incision on the leaf blade and petiole. (b) The frequency  
249 of vascular regeneration at different positions (represented by coloured boxes in (a)) of the leaf  
250 are represented by the same colour bars in the graph (b) Petiole (n=21,  $P=0.95$ , not significant  
251 [ns]), basal correct position (n=45), midvein upper end (n=42,  $***P=0.0009$ ), lateral vein  
252 (n=21,  $***P=0.0002$ ). (c-f) Images show the incision to vasculature in petiole (c), base of  
253 midvein (d), apical region of midvein (e), and lateral vein (f). Note the multiple strand  
254 formation upon injury in petiole (c). Red dots indicate regenerated vascular strand and black  
255 arrowheads represent site of incision. Scale bars represent: 50 $\mu$ m. (g) Gradient represents the

256 efficiency of vascular regeneration along the leaf blade with maximum regeneration  
257 (represented by red) at the base of mid vein. Lateral veins and distal end of midvein exhibit  
258 reduced regeneration frequency.

259

## 260 **Decolourising and clearing samples**

261 1. The sample is placed in 2-3ml of 15% ethanol for 15 minutes.

262 Note: Initially the leaves float on the surface of the solvent. Gently submerge the leaves  
263 using a paint brush with small bristles.

264 2. The ethanol is drained using micropipette with care being taken not to damage the samples.

265 3. Similarly, the samples are treated with 50%, 70% and 96% ethanol consecutively for 15  
266 minutes each. After discarding 96% ethanol, the leaves are incubated for 12 hours in 100%  
267 ethanol for dehydrating the tissue and to remove chlorophyll pigmentation.

268 4. After discarding the ethanol, the samples are consecutively incubated for 15 minutes each  
269 in 96%, 70%, 50% and finally 15% ethanol to rehydrate the samples.

270 5. After discarding the ethanol as mentioned in step 2, freshly prepared clearing solution  
271 (preparation described in materials section) containing chloral hydrate is added to the  
272 sample. The samples are incubated in the clearing solution for atleast 3 hours prior to  
273 mounting the slides for brightfield imaging.

274 Note: Increasing the duration of clearing can enhance the contrast during brightfield  
275 imaging to some extent.

## 276 **Slide preparation**

277 Using a small paint brush, each cleared leaf is placed on a clean slide with the adaxial surface  
278 of the leaf facing upward. The brush can be used to gently tease open any curled leaves without  
279 inflicting any further damage. The coverslip is mounted over the sample, taking care not to

280 create any bubble. Multiple leaves (6-8) can be placed under a single coverslip. The clearing  
281 solution is used for mounting the samples.

282

### 283 **Brightfield Imaging**

284 The regeneration of vascular strands in the cleared samples can be assessed using brightfield  
285 mode in fluorescent or confocal microscope. However, confocal microscope is recommended  
286 to acquire high resolution images of the regenerating xylem elements. The settings described  
287 here are for Leica TCS SP5 II inverted microscope. Argon laser or DPSS 561 can be used for  
288 the imaging at a laser power of 30%, scan speed:200Hz, line average: 2 and pixel  
289 format:1024x1024. Newly formed vascular strands display distinct morphology characterised  
290 by end-to-end connected xylem elements (Fig1. E,F,J,K,Q).When the regenerating vein re-  
291 united the cut ends of the midvein forming a D-loop (Fig1. C, E) or connected either of the cut  
292 ends to a lateral vein (Fig1. D,F), the outcomes were scored as successful regeneration. To  
293 maintain consistency in the methodology, incisions made in locations other than junction of  
294 first lateral vein were not scored while studying age dependency of regeneration. Additionally,  
295 only incisions creating a gap less than 400 $\mu$ m between detached parental strands were scored.

### 296 **Statistical Analysis**

297 Statistical analysis was performed using R software. The collected data was statistically  
298 analysed by Pearson's  $\chi^2$  squared test.

## 299 **RESULTS AND DISCUSSION**

300 Although the regeneration ability of plants have been widely investigated, leaves are seldom  
301 studied for their regeneration and local wound repair ability (Kuchen et al. 2012;  
302 Radhakrishnan et al. 2020). We describe a detailed stepwise method of a novel leaf vascular

303 regeneration assay which can be used to study regeneration of the midvein in response to local  
304 injury. Our studies have previously shown that a mechanical disconnection of midvein, creating  
305 a gap of under 400 $\mu$ m (measured after sample clearing) can be bridged by regenerating vascular  
306 strand (Radhakrishnan et al. 2020). While the injured vascular tissue degenerates, the newly  
307 synthesized vasculature can either reunite the disconnected strands, or connect the cut end to  
308 the nearest lateral vein (Fig. 1B-F). Either way, the reconnection ensures restoration of leaf  
309 vascular network, and transport between leaf and rest of the plant body. However, extensive  
310 damage generating a gap larger than 400 $\mu$ m cannot be repaired, thereby denying functional  
311 restoration of leaf vascular tissue (Radhakrishnan et al. 2020)(Fig.1P). Here, the wound-size  
312 dependency of vascular regeneration was recapitulated *in silico* by implementing a  
313 computational model based on canalisation hypothesis of vein formation in leaf(Rolland-Lagan  
314 and Prusinkiewicz 2005). According to the canalisation hypothesis, positive feedback between  
315 auxin flux and PIN1 polarization leads to channelized auxin flow that, in turn, promotes the  
316 differentiation of vascular tissue(Tsvi Sachs 1991). Consistent with our previous experimental  
317 observations, the computational model demonstrate that the formation of a new vascular strand  
318 is indeed dependent on the size of the opening (mimicking wound induced gap) created in a  
319 matrix of cells (resembling leaf blade). Equations governing the mathematical model and other  
320 relevant details are presented in the supplementary information (Supplementary1,  
321 Supplementary Videos). Our result indicates that in addition to higher animal cells and  
322 unicellular *Dictyostelium*, wound size sensitivity of the repair process is conserved in plants as  
323 well (Pervin et al. 2018).

324 Having substantiated the wound-size dependency of vascular regeneration, we next  
325 investigated whether the regeneration response is dependent on the age of the wounded plant.  
326 In many higher animals progressive aging is associated with reduced the regeneration ability  
327 (Yun 2015). To probe how age regulates the regeneration response in leaves, we performed the

328 incision in plants of ages ranging from 3dpg to 10dpg. Performing incisions on the miniscule  
329 3dpg leaves were tedious and often damaged the leaves excessively. Upon comparison, 3dpg  
330 plants showed lower regeneration efficiency than 5dpg plants (Fig. 1G,1O). Plants belonging  
331 to the age group of 4-6dpg displayed highest regeneration efficiency, making it the optimum  
332 age to study the vascular regeneration in leaves (Fig.1H-J,1O). Although it is easier to perform  
333 incision in older and larger leaves, the regeneration efficiency declined steeply, with 10dpg  
334 leaves completely failing to regenerate (Fig.1K-O). It is important to note that even when injury  
335 induced gap was lesser than 400 $\mu$ m, vascular regeneration was impeded in these older leaves  
336 (Fig.1L-N). Thus our data suggests that vascular regeneration efficiency reduces with increase  
337 in the age of the injured plant.

338 Regeneration studies in plants and animals have demonstrated that the competence to  
339 regenerate in response to injuries can vary even within a specific organ (Durgaprasad et al.  
340 2019; Morgan 1902). So we next examined how the position of incision on the growing leaf  
341 influenced the vein regeneration efficiency. To analyse this, we made incisions at different  
342 positions along the leaf blade, namely, the petiole of the leaf, the basal end (proximal to the  
343 plant body axis) of the midvein, the apical end (distal to the plant body axis) of the midvein  
344 and on the lateral veins (Fig. 2A, 2C-F). The highest regeneration frequency was recorded at  
345 the basal end of the midvein, particularly, between the first and second lateral vein (Fig. 2B,  
346 2D). The petiole also showed similar regeneration efficiency upon incision and often led to  
347 formation of multiple strands in response to injury (Fig. 2B, 2C). However, since the leaf is  
348 excised at the petiole during sample collection, the incision site and regenerated vascular strand  
349 is occasionally damaged leading to loss of valuable samples. Additionally, since incisions  
350 performed in the petiole leads to multiple stand formation instead of single stand regeneration,  
351 it will be more appropriate to make injuries in leaf blade, as the study involves following a  
352 single regenerating strand in real-time to study recognition, communication and reunion of



353 vascular strands. Upon injuring other positions, we observed that the regeneration efficiency  
354 drastically declined towards the apical regions of the midvein and in the lateral veins (Fig. 2B,  
355 2E-G).

356 Collectively, our data demonstrates that the leaf vascular regeneration is sensitive to the size  
357 of the wound, the age of the injured leaf and the position of incision on the leaf.

## 358 **CONCLUSION**

359 Our study reveals that 4-6dpg leaves respond most efficiently to smaller wounds (400 $\mu$ m or  
360 less in size) that are inflicted at the junction of first lateral vein at the proximal end of the leaf  
361 blade. While adopting this assay to study regeneration in other plant species, we recommend  
362 standardization of the method with respect to the above mentioned criteria.

363 The assay will be helpful in exploring the mechanisms underlying regeneration of vascular  
364 tissue in growing leaves. To begin with, the assay may prove tedious, however with repeated  
365 practice; this method can be performed deftly and rapidly in large number of samples. The  
366 short duration of the experiment (experimental data can be collected 5 days post injury) and  
367 the dispensability of specialized equipment make it amenable to the larger scientific  
368 community. Our method, revealing the dependency on leaf age and wound position during  
369 vascular regeneration, can be used in combination with other cell biology and molecular  
370 biology techniques with little or no standardisation, thereby adding to its utility.

## 371 **ACKNOWLEDGMENT**

372 K.P. acknowledges grants from the Department of Biotechnology (DBT), Government of India  
373 [grant BT/PR12394/AGIII/103/891/2014] and Department of Science and Technology,  
374 Science and Engineering Research Board (DST-SERB), Government of India [grant  
375 EMR/2017/002503/PS] and also acknowledges the Indian Institute of Science Education and

376 Research Thiruvananthapuram (IISER-TVM) for infrastructure and financial support. D.R. and  
377 M.M.M acknowledge University Grants Commission (UGC) fellowship. A.K. was supported  
378 by Indian Institute of Science Education and Research-Thiruvananthapuram fellowship. A.P.S.  
379 and V.V. are recipients of Council of Scientific and Industrial Research (CSIR) fellowships.  
380 M.A. acknowledges Department of Biotechnology (DBT), Ministry of Science and  
381 Technology, Government of India for granting the DBT-Post Doctoral Fellowship (DBT-RA  
382 Program). K.R.M. and R.K.R are funded by DBT. A.S. acknowledges the support of the  
383 Science and Engineering Research Board, Government of India through EMR grant No.  
384 EMR/2016/007221. We are thankful to Aswathy Syam, Aleesha Jaleel and Kaustuv Ghosh for  
385 assistance with preliminary experiments.

## 386 **BIBLIOGRAPHY**

- 387 Durgaprasad, Kavya et al. 2019. “Gradient Expression of Transcription Factor Imposes a  
388 Boundary on Organ Regeneration Potential in Plants.” *Cell Reports*.
- 389 Hwang, Hau-Hsuan, Manda Yu, and Erh-Min Lai. 2017. “Agrobacterium -Mediated Plant  
390 Transformation: Biology and Applications .” *The Arabidopsis Book*.
- 391 Ikeuchi, Momoko, Yoichi Ogawa, Akira Iwase, and Keiko Sugimoto. 2016. “Plant  
392 Regeneration: Cellular Origins and Molecular Mechanisms.” *Development (Cambridge)*.
- 393 Iwase, Akira et al. 2011. “The AP2/ERF Transcription Factor WIND1 Controls Cell  
394 Dedifferentiation in Arabidopsis.” *Current Biology*.
- 395 Kareem, Abdul et al. 2015. “PLETHORA Genes Control Regeneration by a Two-Step  
396 Mechanism.” *Current Biology* 25(8): 1017–30.  
397 <http://dx.doi.org/10.1016/j.cub.2015.02.022>.
- 398 Kuchen, Erika E. et al. 2012. “Generation of Leaf Shape through Early Patterns of Growth

- 399 and Tissue Polarity.” *Science*.
- 400 Morgan, T. H. 1902. “Further Experiments on the Regeneration of the Tail of Fishes.” *Archiv*  
401 *für Entwicklungsmechanik der Organismen*.
- 402 Pervin, Mst Shaela et al. 2018. “A Study of Wound Repair in Dictyostelium Cells by Using  
403 Novel Laserporation.” *Scientific Reports*.
- 404 Radhakrishnan, Dhanya et al. 2020. “A Coherent Feed-Forward Loop Drives Vascular  
405 Regeneration in Damaged Aerial Organs of Plants Growing in a Normal Developmental  
406 Context.” *Development (Cambridge, England)* 147(6): 1–10.
- 407 Rolland-Lagan, Anne-Gaëlle, and Przemyslaw Prusinkiewicz. 2005. “Reviewing Models of  
408 Auxin Canalization in the Context of Leaf Vein Pattern Formation in Arabidopsis.” *The*  
409 *Plant Journal* 44(5): 854–65.
- 410 Sachs, T., and M. Hassidim. 1996. “Mutual Support and Selection between Branches of  
411 Damaged Plants.” In *Vegetatio*.
- 412 Sachs, Tsvi. 1991. “Cell Polarity and Tissue Patterning in Plants.” *Development*  
413 113(Supplement 1).
- 414 Shanmukhan, Anju Pallipurath et al. 2020. “Regrowing the Damaged or Lost Body Parts.”  
415 *Current Opinion in Plant Biology*.
- 416 Yun, Maximina H. 2015. “Changes in Regenerative Capacity through Lifespan.”  
417 *International Journal of Molecular Sciences*.

418
